# Supplementary material for: Assessment of the Current Status of Potyviruses in Watermelon and Pumpkin Crops in Spain: Epidemiological Impact of Cultivated Plants and Mixed Infections
Source: MDPI journal article supplement (doi:10.3390/plants10010138), 2021-01-12
Supplement: s1 [file s1]

## Supplementary information

**Table S1.** Amino acid changes through each ORF from the complete genomes of MWMV-ZuM10 and WMV-MeWM7 isolates. Each aa change is based on their non-synonymous mutations, which were analysed by the sequence comparison with the corresponding Sq10 1.1 (MWMV type) and Vera (WMV) isolates.

| <b>Virus/ORF</b> | <b>MWMV-ZuM10</b>          | <b>WMV-MeWM7</b>                                  |
|------------------|----------------------------|---------------------------------------------------|
| <b>P1</b>        | K197E; T262I; G348S; S363L | K34E; M153V; K187N; T274A                         |
| <b>HC-Pro</b>    | -                          | F8I; S10A; K91E; G96R; P110S; L314F; L348F; L394F |
| <b>P3</b>        | P857S; Y872C               | I2V; N30D; N206S; Y215H; I286F; G307E; K335M      |
| <b>6K1</b>       | -                          | S43G                                              |
| <b>CI</b>        | -                          | S249N; N291T                                      |
| <b>6K2</b>       | -                          | -                                                 |
| <b>Nia-VPg</b>   | N2366I                     | E109G; S153F                                      |
| <b>VPg-Pro</b>   | -                          | M54I                                              |
| <b>Nib</b>       | V2423A                     | I42L; V434I; R482K; N505S                         |
| <b>CP</b>        | -                          | P40Q; A41I; D21N; A52N; V58E; I243M               |
